# Supplementary material for: Linking the Transcriptional Profiles and the Physiological States of Mycobacterium tuberculosis during an Extended Intracellular Infection
Source: PLoS Pathog. 2012 Jun 21;8(6):e1002769. doi: 10.1371/journal.ppat.1002769 (PMC3380936; doi:10.1371/journal.ppat.1002769)
Supplement: Table S7 — Figure 5B (black) - Genes with Early Repressed, Sustained temporal profile. (XLSX) [file ppat.1002769.s016.xlsx]

## Sheet: Sheet1
Table S7
Figure 5B (black) - Genes with Early Repressed, Sustained temporal profile
			Time
			2hr	Day 2	Day 4	Day 6	Day 8	Day 10	Day 12	Day 14
Gene	Common	Synonym	Ratio	Ratio	Ratio	Ratio	Ratio	Ratio	Ratio	Ratio	Description (Tuberculist annotation)
MT1342			1.01426	0.780166	0.82194	0.792517	0.806175	0.834816	0.789331	0.821058	hypothetical protein
MT1924.1			1.11167	0.501735	0.555968	0.538855	0.551479	0.607332	0.590851	0.60088	hypothetical protein
rpli	Rv0056		1.1401	0.843711	0.850973	0.857903	0.841319	0.833716	0.839632	0.821447	Rv0056, (MTCY21D4.19), len: 152, highly similar to RL9_MYCLE P46385 50s ribosomal protein l9 (152 aa), fasta scores, opt: 847, E(): 0, (88.7% identity in 150 aa overlap); contains PS00651 Ribosomal protein L9 signature
Rv0483	Rv0483	lprQ	1.01978	0.783189	0.788205	0.749037	0.767236	0.767376	0.740219	0.756328	Rv0483, (MTCY20G9.09), len: 451, unknown, similar to several M. tuberculosis hypothetical proteins, e.g, MTV009_3, MTCY493_21, MTCI28_32, MTV031_10, also similarity toMycobacterium leprae MLCL383_24 O07707 HYPOTHETICAL 43.6 KDPROTEIN and to Q49706 B1496_F2_81 (271 aa). FASTA scores,opt: 324, z-score: 344.1, E(): 3.2e-12, (29.8% identity in228aa overlap)
Rv0635	Rv0635		1.21127	0.917912	0.927935	0.871513	0.91511	0.935404	0.921623	0.955106	Rv0635, (MTCY20H10.16), len: 158, unknown similar to YV31_MYCTU Q11168 hypothetical 18.4 kd protein cy20g9.31 (166 aa), fasta scores, opt: 405, E(): 3.2e-22, (45.0% identity in 140 aa overlap) and YV31_MYCLE P54879 hypothetical 18.7 kd protein b2168_f2 (166 aa), fasta scores, opt: 387, E(): 5.9e-21, (43.4% identity in 145 aa overlap) also similar to MTY20H10_19 (2 ORFs downstream, 48.7% identity …
rplJ	Rv0651		1.17237	0.897659	0.889867	0.873419	0.863455	0.904067	0.86925	0.869161	Rv0651, (MTCY20H10.32), len: 178 aa, rplJ, similarto eg RL10_STRGR STREPTOMYCES GRISEUS, P36257 50s ribosomalprotein l10. (185 aa), fasta scores, opt: 633, E(): 0, (59.0% identity in 173 aa overlap)
Rv0669c	Rv0669c		1.32334	0.920742	0.906036	0.935654	0.85831	0.960159	0.91031	0.88059	Rv0669c, (MTCI376.05), len: 637 unknown, but similarto SLIME MOLD DDU82513_1 Dictyostelium discoideum sp|O15913|O15913 RANDOM SLUG CDNA25 PROTEIN (FRAGMENT) (702 aa), FASTA scores: opt: 756 z-score: 822.1 E(): 0; 35.5% identity in 676 aa overlap Contains PS00017 ATP/GTP-binding site motif A
rplV	Rv0706		0.890046	0.649511	0.672754	0.650301	0.627772	0.675282	0.672007	0.657972	Rv0706, (MTCY210.25), len: 197 aa, rplV, almost identical to MBS10OPER_7 Mycobacterium bovis BCG and MLCB2492_7 Mycobacterium leprae RIBOSOMAL PROTEIN L22. Also similarto eg RL22_BACSU P42060 50s ribosomal protein l22 (113 aa),fasta scores, opt: 368, E(): 2.4e-13, (52.8% identity in 108 aa overlap); contains PS00464 Ribosomal protein L22 signature, contains repetitive sequence at C-terminus
rplF	Rv0719		1.0606	0.851277	0.89528	0.84408	0.82367	0.844097	0.84714	0.858225	Rv0719, (MTCY210.38), len: 179 aa, rplF, almost identical to MLCB2492_19 Mycobacterium leprae O32998 RIBOSOMALPROTEIN L6; also highly similar to RL6_STRCO P46786 50s ribosomal protein l6. streptomyces (179 aa), fasta scores, opt: 872, E(): 0, (70.4% identity in 179 aa overlap); containsPS00525 Ribosomal protein L6 signature 1
Rv0846c	Rv0846c		1.10412	0.67871	0.680255	0.708404	0.736562	0.677745	0.659072	0.674998	Rv0846c, (MTV043.39c), len: 504. Unknown but similar to several L-ascorbate oxidases e.g. (579 aa). Contains PS00080 Multicopper oxidases signature 2 at C-terminus. FASTA scores: sp|P24792|ASO_CUCMA L-ASCORBATE OXIDASE PRECURSOR(579 aa) opt: 423 z-score: 457.2 E(): 5.8e-18; 28.4% identity in 493 aa overlap. TBparse score is 0.904
Rv0849	Rv0849		1.10801	0.764302	0.730333	0.747059	0.674106	0.739026	0.740907	0.736986	Rv0849, (MTV043.42), len: 419. Probable integral membrane transport protein, some similarity to quinolone efflux pumps e.g. Staphylococcus S74031_1 (388 aa). FASTA scores: X92076|ECGRXB_1 (402 aa) opt: 447 z-score: 559.5 E():1.2e-23; 26.2% identity in 385 aa overlap; and S74031|S74031_1 (388 aa) opt: 250 z-score: 315.1 E(): 4.8e-10; 21.3% identity in 394 aa overlap. TBparse score is 0.908
Rv0942	Rv0942		1.01252	0.808603	0.855678	0.808184	0.794471	0.81133	0.819147	0.848595	Rv0942, (MTCY10D7.32c), len: 92.
accA2	Rv0973c		1.24108	0.795284	0.783133	0.778229	0.756032	0.780262	0.733641	0.770975	Rv0973c, (MTV044.01c-MTCY10D7.01), len: 667,accA2, Probable carbamoyl-phosphate synthase, biotin dependent,similar to pyruvate- or urea- carboxylases, similar to many e.g. MTCY349_20. FASTA scores: gp|Z83018|MTCY349_20 M. tuberculosis cosmid (1127 aa) opt: 838 z-score: 961.3 E(): 0. 40.2% identity in 500 aa overlap; contains PS00867 Carbamoyl-phosphate synthase subdomain signature 2MTCY10D7.01, p…
Rv1199c	Rv1199c		1.01656	0.730526	0.743395	0.736088	0.721058	0.751148	0.729927	0.781791	Rv1199c, (MTCI364.11c), len: 415. Transposase for IS1081, identical to TRA1_MYCBO P35882 transposase for insertion sequence element (415 aa), region identical to MTCY441.35, (100.0% identity in 261 aa overlap), almost identicalto MTCY10G2.02c (415 aa) (99.8% identity in 415 aa overlap);contains PS01007 Transposases, Mutator family, signature,PS00435 Peroxidases proximal heme-ligand signature
Rv1519	Rv1519		1.22961	0.59784	0.691476	0.644336	0.635201	0.703757	0.642367	0.680235	Rv1519, (MTCY19G5.09c), len: 89. Unknown, high similarity to C-terminus of MTCY78.26, 58.1% identity in 74aa overlap.
Rv1703c	Rv1703c		0.72091	0.543652	0.580726	0.570047	0.559981	0.568512	0.584556	0.593772	Rv1703c, (MTCI125.25c), len: 196. Probable o-methyltransferase, most similar to the soluble form of mammalian catecholo-methyltransferase eg. COMT_HUMAN P21964 catechol o-methyltransferase (271 aa), fasta scores; opt: 405 z-score: 642.3 E(): 7.8e-29, 38.9% identity in 190 aa overlap
Rv1749c	Rv1749c		1.18113	0.788743	0.819994	0.823671	0.829653	0.877961	0.84948	0.83194	Rv1749c, (MTCY28.12c-MTCY04C12.33c), len: 185. Possible integral membrane protein, similar to hypothetical protein TR:O27914 (EMBL:AE000940) MTH1892 from Methanobacterium thermoautotrophicum (168 aa), fasta scores; E(): 9.3e-16,37.4% identity in 123 aa overlap
Rv1778c	Rv1778c		1.07067	0.870546	0.851041	0.817652	0.814633	0.837728	0.87203	0.846529	Rv1778c, (MTCY25C11.05c), unknown, len: 149 aa
Rv1941	Rv1941		1.13478	0.923085	0.940413	0.933901	0.975884	0.936146	0.915048	0.936209	Rv1941, (MTCY09F9.23c), len: 256 aa. Dehydrogenase similar to eg LINC_PSEPA P50197 2,5-dichloro-2,5-cyclohexadiene-1,4-d (250 aa), fasta scores, opt: 529, E(): 5.7e-25, (40.6% identity in 251 aa overlap); contains PS00061 Short-chain alcohol dehydrogenase family signature
Rv2791c	Rv2791c		0.838967	0.447824	0.487481	0.477975	0.460358	0.520947	0.495839	0.463189	Rv2791c, (MTV002.56c), probable IS1602 transposase len: 459 aa; similar to many eg. TR:Q56249 (EMBL:D38778) TRANSPOSASE-LIKE PROTEIN OF PS3IS (369 aa), fasta scores; opt: 327 z-score: 426.0 E(): 1.4e-16, 26.8% identity in 399 aaoverlap
Rv2908c	Rv2908c		0.962817	0.781062	0.780344	0.781106	0.752439	0.750478	0.764474	0.767715	Rv2908c, (MTCY274.40c), len: 80. Unknown but equivalent to M. leprae sp|O33015|O33015 HYPOTHETICAL 8.6 KD PROTEIN. (80 aa) opt: 492 z-score: 660.6 E(): 2.8e-29; 93.8% identity in 80 aa overlap
Rv2959c	Rv2959c		1.1092	0.812927	0.7795	0.779188	0.791228	0.776311	0.773227	0.792184	Rv2959c, (MTCY349.29), len: 245 aa. Unknown, identical to G560520 U0002JB, some similarity to methyltransferases
Rv2963	Rv2963		0.890398	0.500232	0.5611	0.542991	0.550074	0.525332	0.480202	0.523958	Rv2963, (MTCY349.24c), len: 406 aa. Unknown, integral membrane protein, identical to G560523 U0002F
gatA	Rv3011c		0.89935	0.728665	0.724053	0.719867	0.730568	0.708032	0.704545	0.743702	Rv3011c, (MTV012.25c), len: 494. Probable gatA, Glu-tRNA-Gln amidotransferase subunit A similar to several e.g. G2589195 (486 aa). See Proc Natl Acad Sci U S A 1997 Oct28;94(22):11819-11826. Similar to many prokaryotic and eukaryotic amidases, best with Mycobacterium leprae MLCB637_13and Synechocystis P73558. FASTA score: Z99263|MLCB637_13 Mycobacterium leprae cosmid B637. (497 aa) opt: 2839 z-sc…
Rv3234c	Rv3234c		0.912623	0.697993	0.731054	0.734959	0.731796	0.718933	0.769906	0.721898	Rv3234c, (MTCY20B11.09c), len: 271, unknown but some similarity to hypothetical M. tuberculosis proteins e.g. MTCY21B4.43, 1.5e-23; MTCY03A2.28, 1.3e-17; MTCY31.23, 8.8e-14., MTCY493_29 , MTCY28_26 , MTV013_8, MTY13E12_33 etc. FASTA best: YZ23_MYCTU Q10554 hypothetical 53.9 kd protein cy31.23. (505 aa) opt: 327 z-score: 384.6 E(): 2e-14; (30.0%identity in 270 aa overlap)
phoY1	Rv3301c		1.27063	1.04498	0.990954	0.960003	0.963909	0.994807	1.00805	0.977404	Rv3301c, (MTCI418A.03c), len: 221 aa phoY, probablephosphate transport system regulatory protein, highly similar to M. leprae Q50047 phoY (222 aa), fasta scores; opt:929 z-score: 1110.0 E(): 0, 61.5% identity in 218 aa overlap.Also similar to MTV043_13 (213 aa, 63.4% identity in 213 aaoverlap)
metC	Rv3340		1.06004	0.781588	0.769621	0.780153	0.756441	0.818451	0.803789	0.83289	Rv3340, (MTV016.40), len: 449. Probable homocysteine synthase (EC 4.2.99.10) similar to many fungal enzymes e.g. P50125|CYSD_EMENI (437 aa). Contains PS00868 Cys/Met metabolism enzymes pyridoxal-phosphate attachment site. FASTA scores: sp|P50125|CYSD_EMENI O-ACETYLHOMOSERINE (THIOL)-LYASE (437 aa) opt: 1442 z-score: 1703.1 E(): 0; 53.7% identity in 430 aa overlap. TBparse score is 0.869
Rv3353c	Rv3353c		1.25482	0.87807	0.856313	0.859231	0.879388	0.88786	0.875564	0.864188	Rv3353c, (MTV004.10c), len: 114 aa; unknown, weak similarity to M. leprae hypothetical protein TR:Q49720 (EMBL:U00014) B1549_C3_218 (222 aa), fasta scores; opt: 121 z-score: 210.3 E(): 0.00015, 33.0% identity in 100 aa overlap Also similar to part of MTV030_7, E(): 3.4e-14, 51.6% identity in 91 aa overlap
glmS	Rv3436c		1.01857	0.756335	0.718632	0.712449	0.681811	0.741996	0.729295	0.734525	Rv3436c, (MTCY77.08c), len: 624 aa. glmS, probableglucosamine-fructose-6-phosphate aminotransferasehighly similar to M. leprae GLMS_MYCLE P40831 probable glucosamine--fructose-6-phosphate aminotransferase (624 aa), fasta scores, opt: 3570, E(): 0, (89.0% identity in 627 aa overlap)
Rv3651	Rv3651		1.0176	0.704434	0.719259	0.72167	0.709412	0.710146	0.726986	0.792535	Rv3651, (MTCY15C10.01c), len: 345. Function: unknown
